# Supplementary material for: Stable nuclear expression ofATP8andATP6genes rescues a mtDNA Complex Vnullmutant
Source: Oxford University Press journal article supplement (doi:10.1093/nar/gkw756), 2016-09-04
Supplement: 2468421_Supplementary_Data.zip [file 2468421_Supplementary_Data.zip]

## **SUPPLEMENTARY TABLE AND FIGURE LEGENDS**

**Supplementary Table S1. A) Mass Spectrometric Report of identified Proteins: Human Protein Pilot Search Results for WT and A8/6<sup>mut</sup> cell lines. B). Mass Spectrometric Report of identified Peptides and Proteins: Human Protein Pilot Search Results for WT and A8/6<sup>mut</sup> cell lines. C). Mass Spectrometric Identification of Proteins ATP6 and ATP8 Protein Pilot Search Results.**

**Supplementary Table S2. A). Relative Quantification of ATP6 and ATP8 from WT and A8/6<sup>mut</sup> strains (Experiment 1). B). Relative Quantification of ATP6 from WT, A8/6<sup>mut</sup>, and A8/6<sup>mut</sup> + A8F strains (Experiment 2). C). Relative Quantification of other proteins from WT and A8/6<sup>mut</sup> strains (Experiment 1). D). Relative Quantification of other proteins from WT, A8/6<sup>mut</sup>, and A8/6<sup>mut</sup> + A8F strains (Experiment 2).**

**Supplementary Table S3. Primer sets to distinguish WT and mutant *ATP8* gene sequences through ARMS (amplification refractory mutation system) sequencing qPCR.**

**Supplementary Table S4. Selection of Clones by ARMS qPCR. DNA derived from the parental mutant strain and 143B served as controls.  $\Delta C_T$  is expressed as the average difference in critical threshold cycle number for amplification between the mutant and WT primer sets.**

**Supplementary Table S5. Determination of *ATP5G1-ATP8* and *ATP5G1-ATP6* mRNA.** Values are presented as means  $\pm$  S.D. (n=3), in comparison with parental A8/6<sup>mut</sup> and using *COX10* as the reference gene. The difference in  $C_T$  values ( $-\Delta C_T$  (test-parental)) indicates efficiency of priming relative to the parental A8/6<sup>mut</sup> cell line that does not express any of the exogenous constructs.

**Supplementary Table S6.  $\Delta\Delta C_T$  values were calculated by first subtracting the  $C_T$  values of the housekeeping gene (*MT-CYB*) from each experimental time point, and then subtracting the  $C_T$  values for the control (day 0) from the experimental (glucose days 15 or 28 or galactose). Error is SEM.**

**Supplementary Figure S1.** Codon-corrected and codon optimized mitochondrial *ATP8* gene or codon-corrected *ATP6* was cloned into pCMV6 expression vectors (G418 / puromycin resistant; Origene, Rockville, MD). This resulted in the incorporation of a Myc and a FLAG

tag in tandem downstream to the genes. The *ATP5G1* MTS is appended upstream to the *ATP8* and *ATP6* coding sequences.

**Supplementary Figure S2. Characterization of proteolytic peptides from ATP8 and ATP6 proteins by tandem mass spectrometry.** **A).** MS/MS spectrum of proteolytic peptide ICSLHSLPPQS from human ATP8 protein (P03928). The precursor ion at  $m/z$  619.81 ( $z=2$ ) was selected for collision-induced dissociation. **B).** MS/MS spectrum of proteolytic peptide LITTQQWLIK from human ATP6 protein (P00846). The precursor ion at  $m/z$  622.37 ( $z=2$ ) was selected for collision-induced dissociation. Skyline spectral libraries were built containing these ATP8 and ATP6 MS/MS spectra.

**Supplementary Figure S3. Relative quantification of proteolytic peptides for proteins ATP8 and ATP6 comparing WT and A8/6<sup>mut</sup> strains.** Peak areas under the curve were determined from extracted ion chromatograms (XICs) from data-independent SWATH acquisitions (Experiment 1). Initial assessments: samples from cell lines were acquired in biological duplicates and technical (MS injection) duplicates. **A).** Peak areas for proteolytic peptide LITTQQWLIK from ATP6 with a precursor ion at  $m/z$  622.37 ( $z=2$ ) are displayed. Relative ATP6 levels are significantly reduced to 9% in A8/6<sup>mut</sup> strains (green) compared to WT strains (blue) with a determined p-value of 9.3 e-09 (\*\*\*). **B).** Peak areas for proteolytic peptide ICSLHSLPPQS from ATP8 with a precursor ion at  $m/z$  619.81 ( $z=2$ ) are displayed. Relative ATP8 levels of the A8/6<sup>mut</sup> strain (green) are measured at <3% of ATP8 levels in the WT strains (blue) with a determined p-value of 5.1e-07 (\*\*\*), which was below background detection levels. (<sup>#</sup> see also Supplementary Figure 6A and B).

**Supplementary Figure S4. Relative quantification of proteolytic peptides for protein ATP6 comparing WT, A8/6<sup>mut</sup>, and A8/6<sup>mut</sup> + A8F cells.** In an independent experimental setup (Experiment 2) tryptic peptide LITTQQWLIK (with a precursor ion at  $m/z$  622.37 with  $z=2$ ) derived from protein ATP6 was quantified during data-independent SWATH acquisitions. Panels **A).** and **B).** show extracted ion chromatograms (XICs) from fragment and precursor ions for WT, A8/6<sup>mut</sup>, and A8/6<sup>mut</sup> + A8F cells in the form of bar graphics. WT and A8/6<sup>mut</sup> cell lines were acquired in biological triplicates, the A8/6<sup>mut</sup> + A8F strain was analyzed for 4 biological replicates, and normalized peak areas from all biological replicates and strains are displayed. **A).** Normalized peak areas for ATP6 peptide for all individual acquisitions from all different conditions/strains. **B).** Normalized peak areas for ATP6 peptide averaged for each of the three different conditions.

**Supplementary Figure S5. Relative quantification of other proteins comparing WT, A8/6<sup>mut</sup>, and A8/6<sup>mut</sup> + A8F strain.** Additional mitochondrial proteins were quantified from the SWATH acquisitions (Experiment 2) comparing relative abundance levels between the A8/6<sup>mut</sup> and WT strains (Panel A), and A8/6<sup>mut</sup> + A8F strain vs. WT strain (Panel B). Protein fold changes are displayed for some mitochondrial housekeeping proteins (CH60: 60 kDa heat shock protein, and ADT2: ADP/ATP translocase 2), as well as several ATP synthase protein subunits of the CV assembly. Displayed relative protein fold changes are mostly ~1, indicating no or small changes, most of them not significant. Relative quantification of other proteins comparing WT, A8/6<sup>mut</sup>, and A8/6<sup>mut</sup> + A8F strain. Additional mitochondrial proteins were quantified from the SWATH acquisitions (Experiment 2) comparing relative abundance levels between the A8/6<sup>mut</sup> and WT strains (**Panel A**), and A8/6<sup>mut</sup> + A8F strain vs. WT strain (**Panel B**). Protein fold changes are displayed for some mitochondrial housekeeping proteins (CH60: 60 kDa heat shock protein, and ADT2: ADP/ATP translocase 2), as well as several ATP synthase protein subunits of the CV assembly. Displayed relative protein fold changes are mostly ~1, indicating no or small changes, most of them not significant.

**Supplementary Figure S6. Assessment of XICs and corresponding fragment ion distributions obtained from SWATH acquisitions in comparison to original spectral library MS/MS spectra. A).** Peak areas for ATP8 – ICSLHSLPPQS peptide for selected replicates from WT and A8/6<sup>mut</sup> strain indicating much lower relative abundance in the A8/6<sup>mut</sup> strain. **B).** Displaying a view “normalized to total (100%)” reveals that while WT SWATH replicates show highly similar fragment ion distribution compared to the spectral library distribution (left bar), the A8/6<sup>mut</sup> strain shows a non-significant and random fragment ion distribution for the ATP8 peptide ICSLHSLPPQS. The latter is also supported by very low “idotp” values of 0.55 and 0.57 for the A8/6<sup>mut</sup> strain (the idotp describes a correlation between spectral library MS/MS and SWATH XIC fragment ion distribution, with 1 for highest similarity). These findings conclude that no ATP8 could be confidently measured in the A8/6<sup>mut</sup> strain with our detection limits (signal is below noise level). **C).** Peak areas for ATP6 – LITTQQWLIK peptide for selected replicates from WT and A8/6<sup>mut</sup> strain indicating lower relative abundance in the A8/6<sup>mut</sup> strain. **D).** However, the “normalized to total (100%)” view reveals that both WT and A8/6<sup>mut</sup> strains show highly similar fragment ion distribution compared to the spectral library distribution (left bar) for LITTQQWLIK, concluding that ATP6 peptide was confidently identified in the different strains.

**Supplementary Figure S7. Blue Native Gel Western Blots.** **A.** A8/A6<sup>mut</sup> cell mitochondrial extracts with or without stably expressed G2A8V5. **B.** Complex I resolution using an NDUF53 antibody. We believe \* to be CI monomers and \*\* to be CI oligomers. **C.** Native Western blot of TIM23 containing complexes.
